# Supplementary material for: 3(2H)-Furanone as a promising scaffold for the synthesis of novel fluorescent organic dyes: an experimental and theoretical investigation
Source: Royal Society of Chemistry journal article supplement (doi:10.1039/c5nj00842e), 2015-01-01
Supplement: c5nj00842e1.pdf [file c5nj00842e1.pdf]

### 3(2H)-Furanone as a promising scaffold for the synthesis of novel fluorescent organic dyes: An experimental and theoretical investigation.

Beena Varghese, Saleh N. Al-Busafi, \*FakhrEldin O. Suliman\*, Salma Al-Kindy

Department of Chemistry, College of Science, Sultan Qaboos University, Box 36, Al-khod 123, Sultanate of Oman, Oman

Email: [fsuliman@squ.edu.om](mailto:fsuliman@squ.edu.om); [alkindy@squ.edu.om](mailto:alkindy@squ.edu.om). Phone: +968-24141480, fax: +968-24141469.

## Supporting Information

### New Journal of Chemistry

Figure S1. The  $^1\text{H}$  NMR spectrum ( $\text{CDCl}_3$ ) of 5-phenyl -3(2H) -furanone

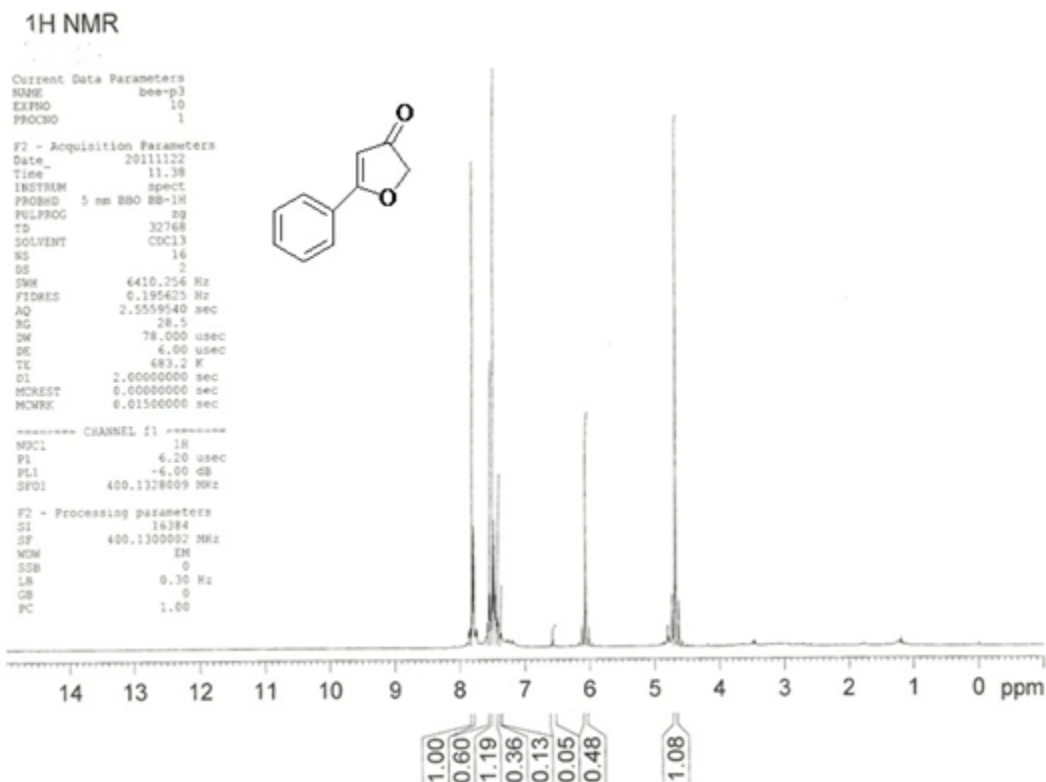

Figure S2. The  $^{13}\text{C}$  NMR spectrum ( $\text{CDCl}_3$ ) of 5-phenyl -3(2H) -furanone

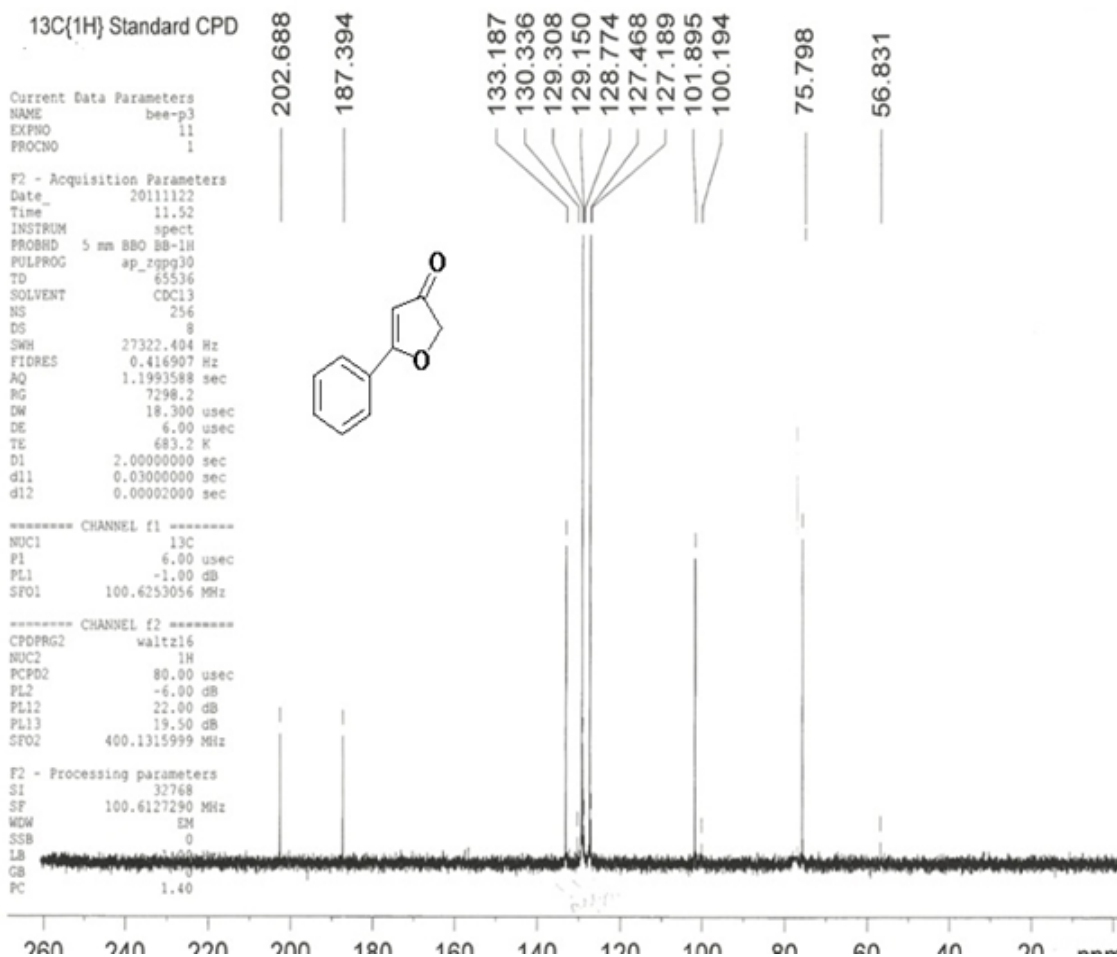

Figure S3. The  $^1\text{H}$  NMR spectrum ( $\text{CDCl}_3$ ) of FNPF

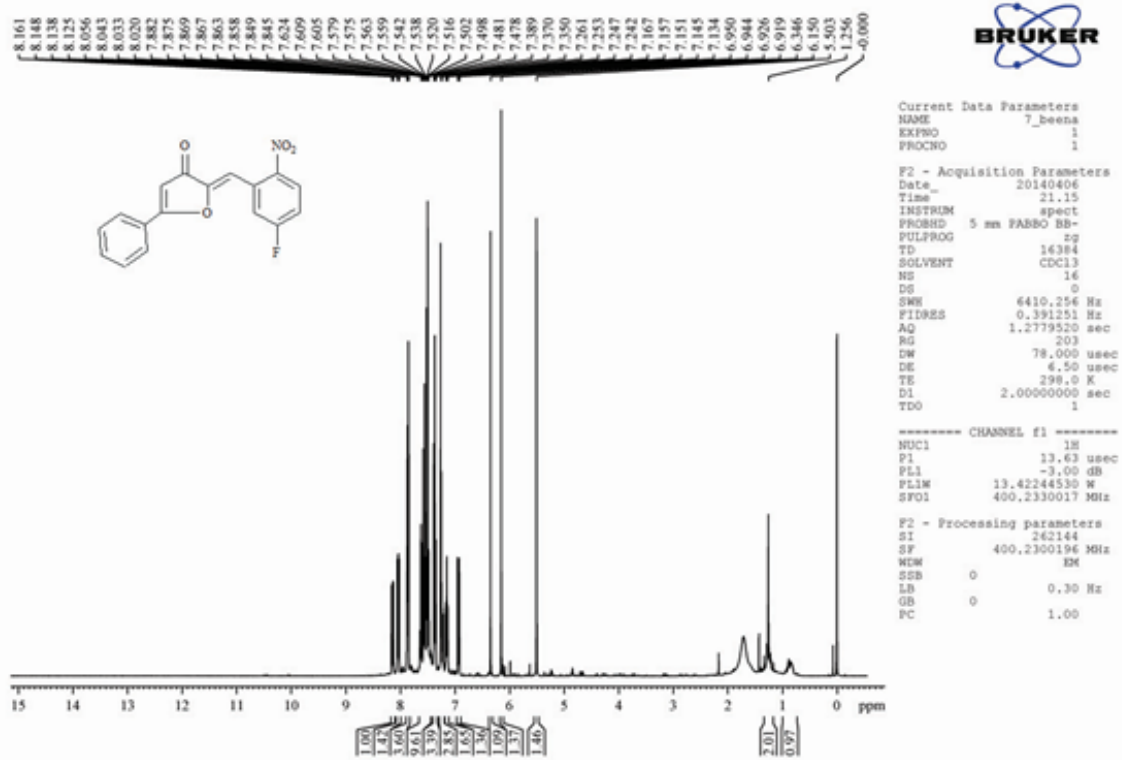

Figure S4. The  $^{13}\text{C}$  NMR spectrum ( $\text{CDCl}_3$ ) of FNPF

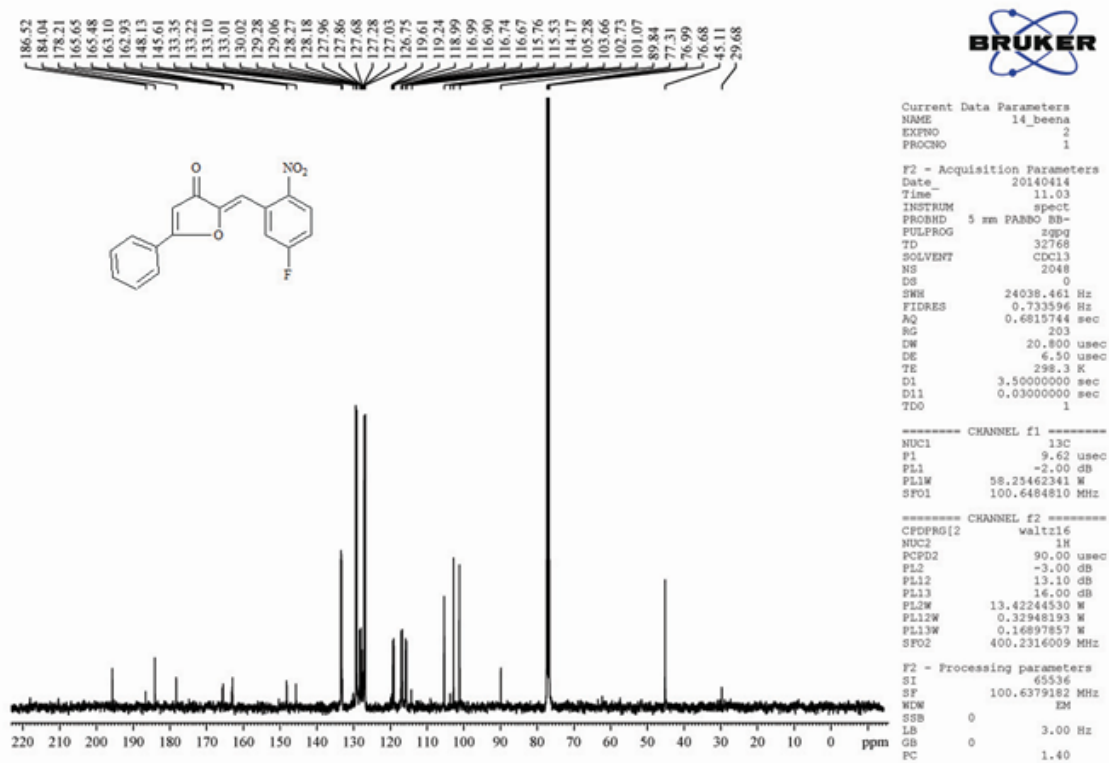

Figure S5. The DEPT (135) NMR spectrum (CDCl<sub>3</sub>) of FNPF

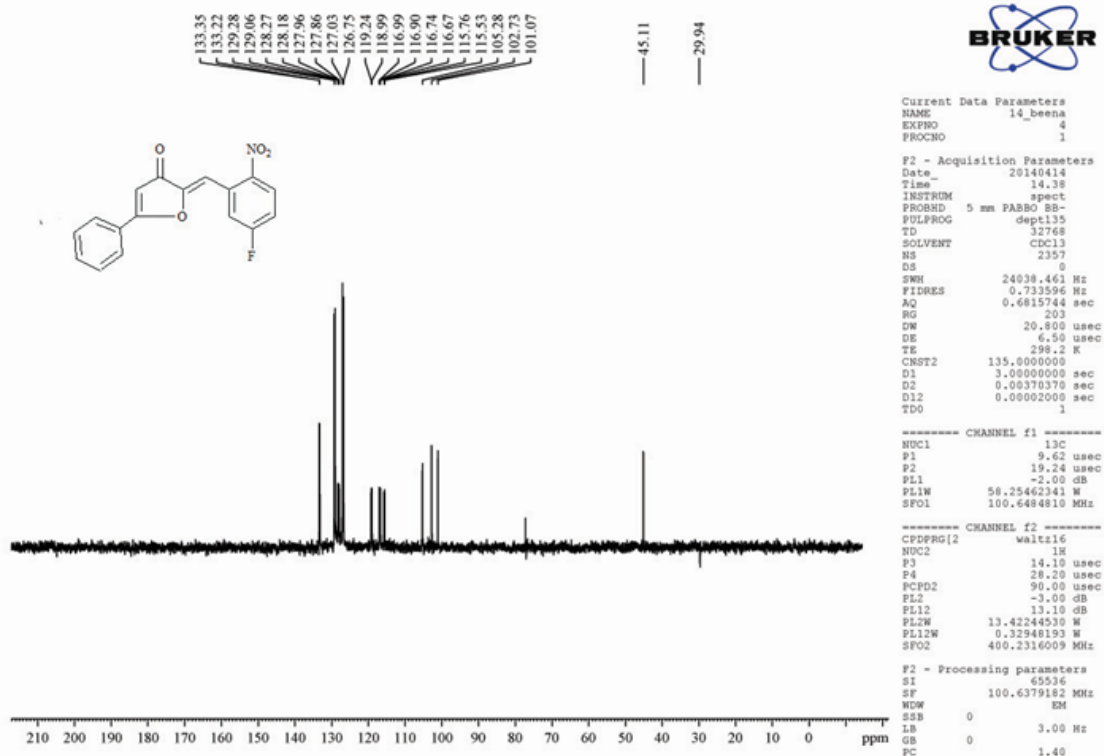

Figure S6. The DEPT (90) NMR spectrum (CDCl<sub>3</sub>) of FNPF

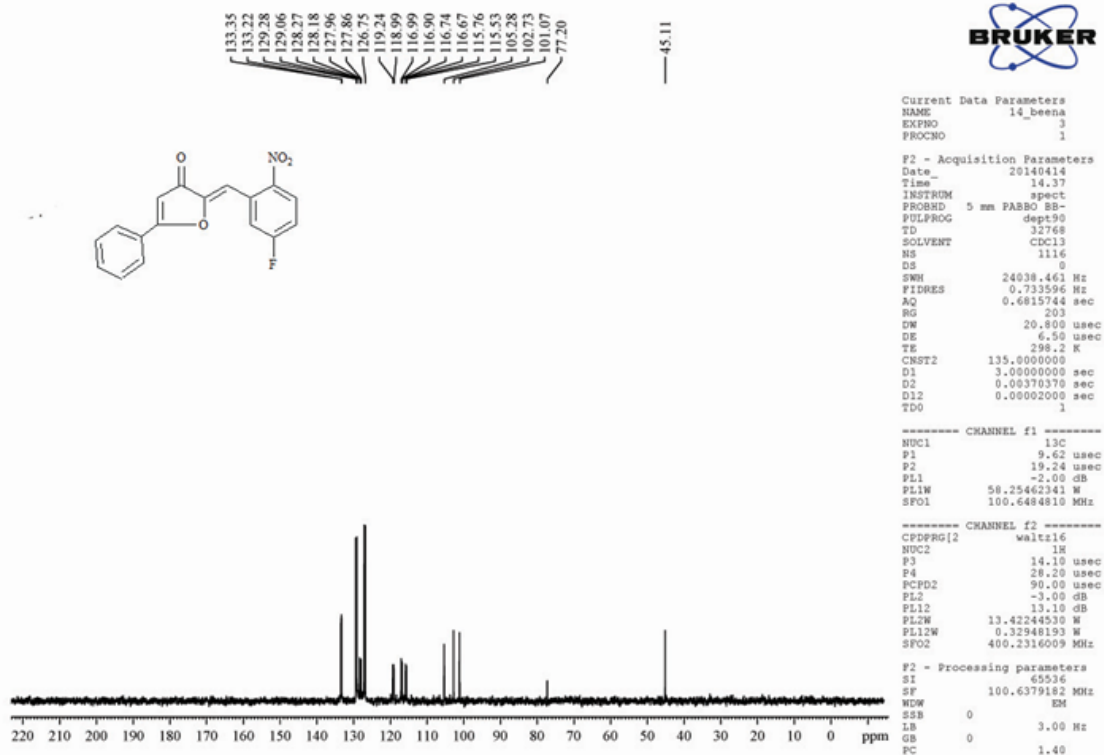

Figure S7. The  $^1\text{H}$ ,  $^1\text{H}$ -COSY NMR spectrum ( $\text{CDCl}_3$ ) of FNPF

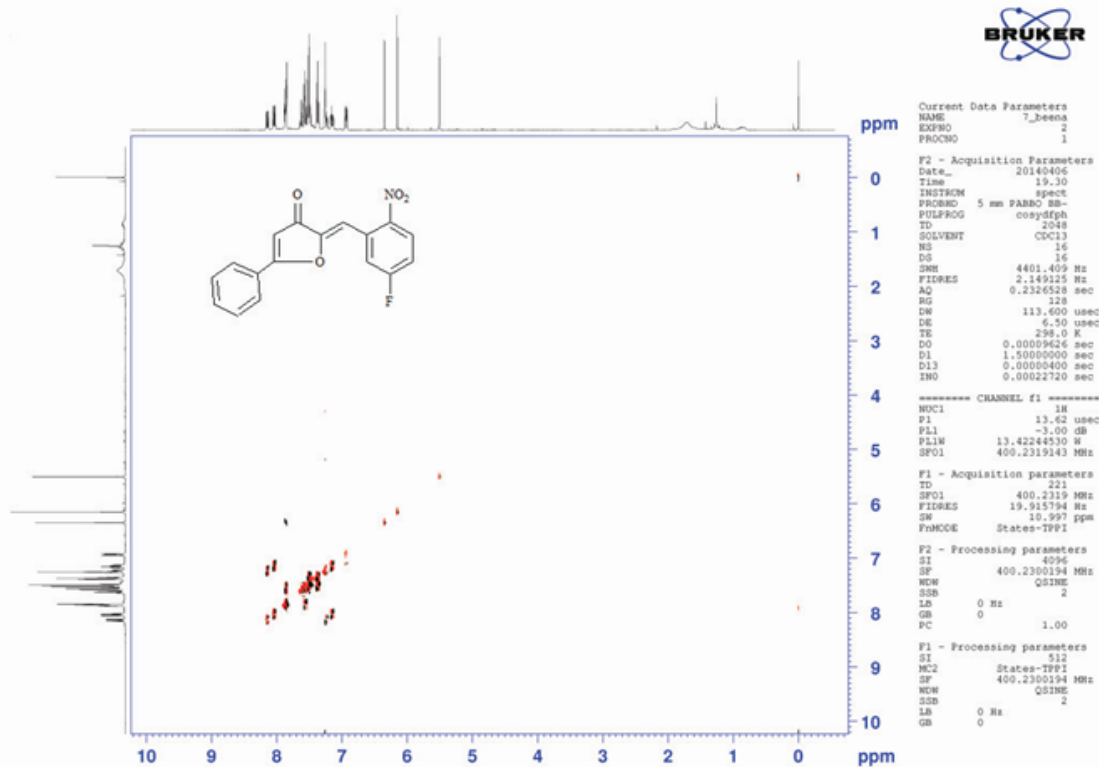

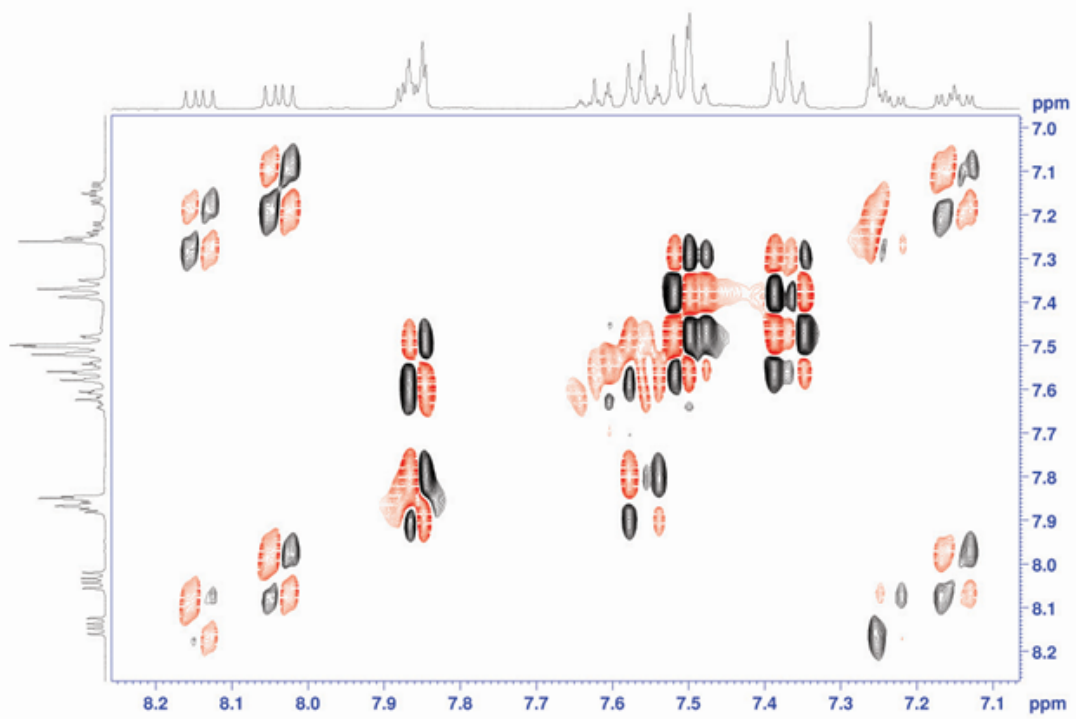



**Figure S8. The LC-MS spectrum of FNPF**

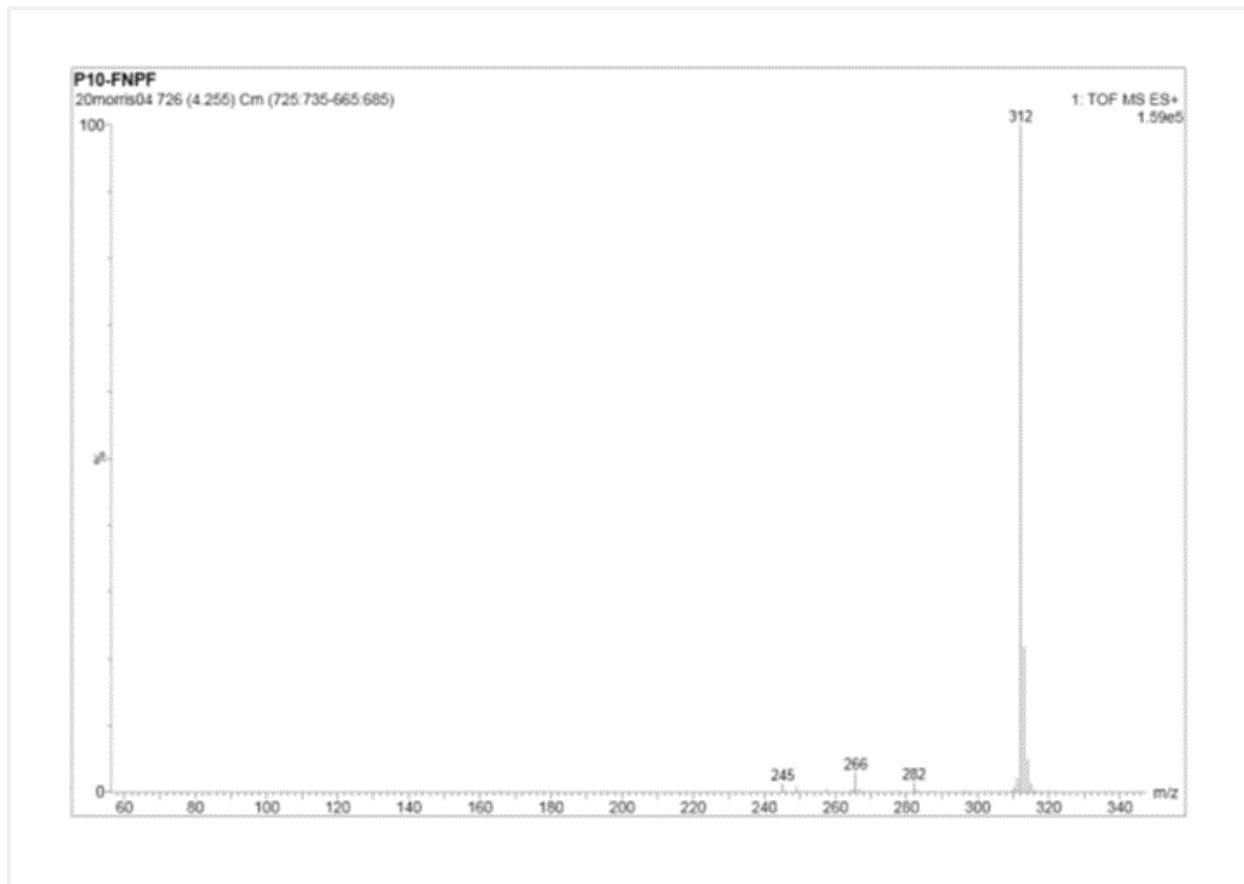

Figure S9. The  $^1\text{H}$  NMR spectrum ( $\text{CDCl}_3$ ) of CBPF

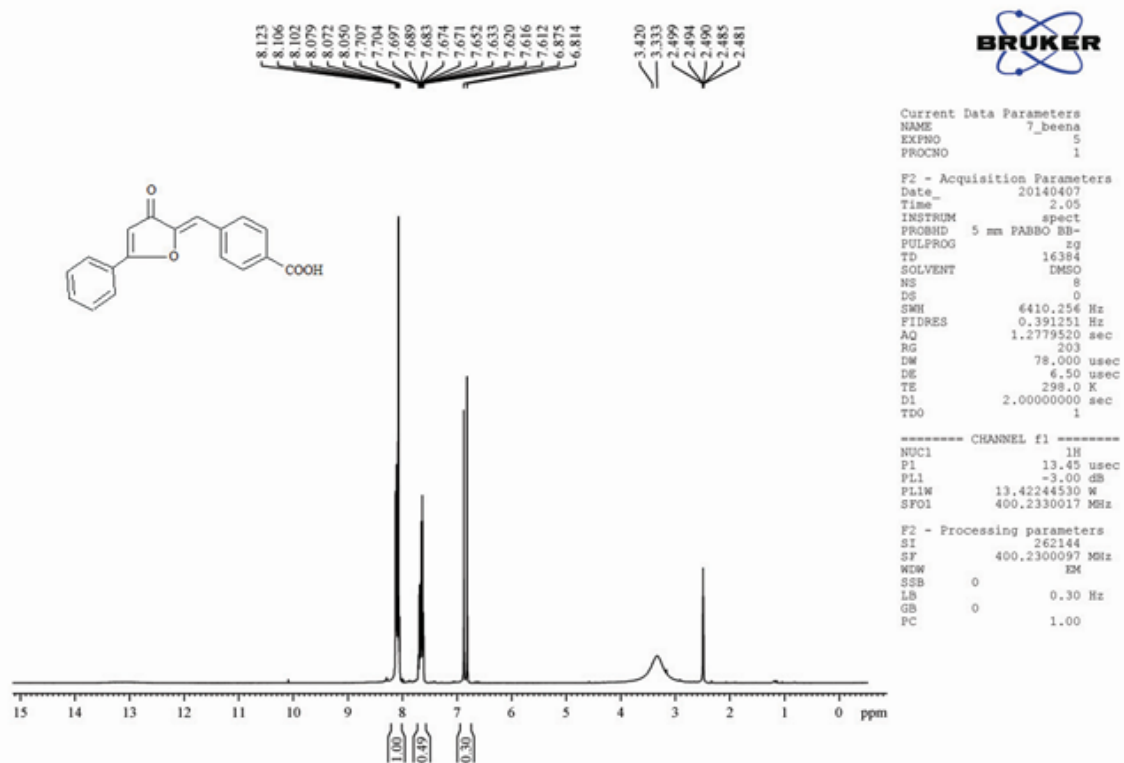

Figure S10. The  $^{13}\text{C}$  NMR spectrum ( $\text{CDCl}_3$ ) of CBPF

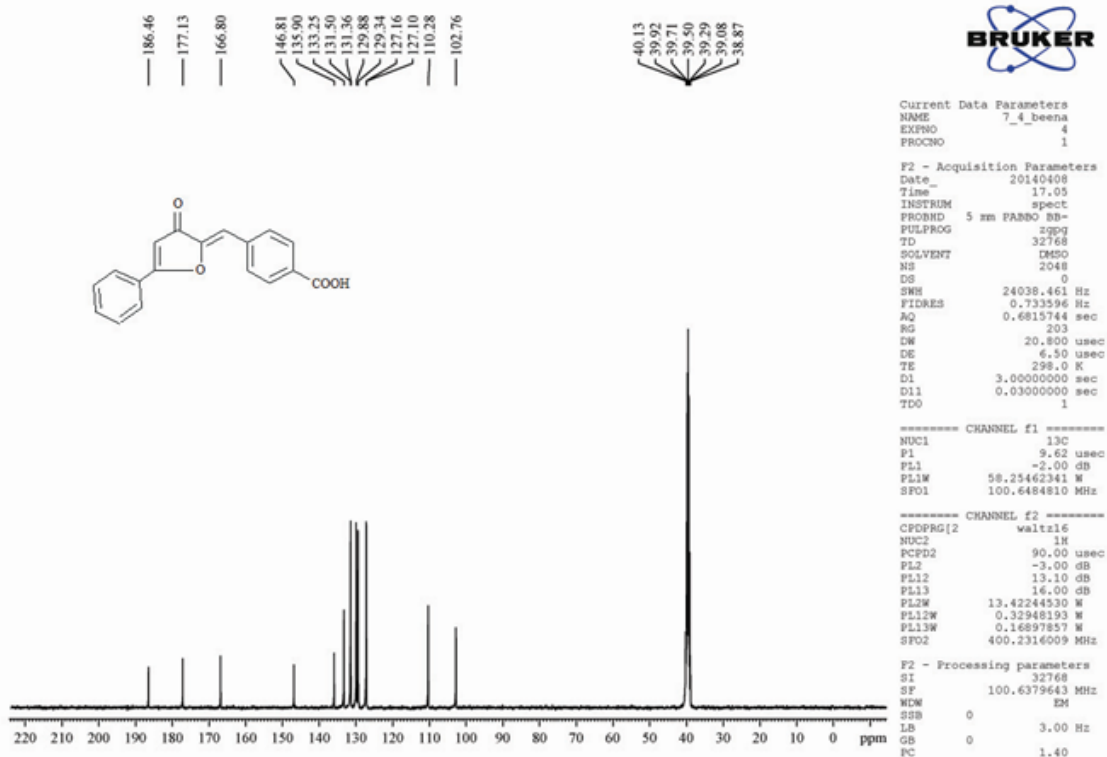

Figure S11. The DEPT (135) NMR spectrum (CDCl<sub>3</sub>) of CBPF

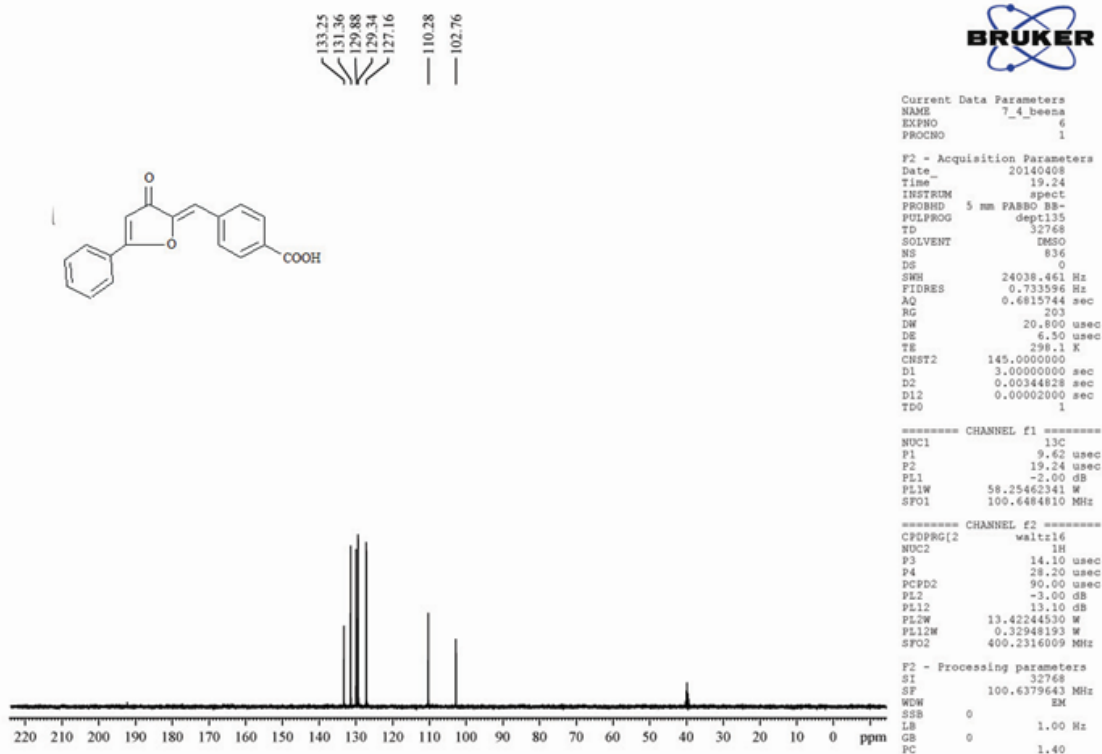

Figure S12. The DEPT (90) NMR spectrum (CDCl<sub>3</sub>) of CBPF

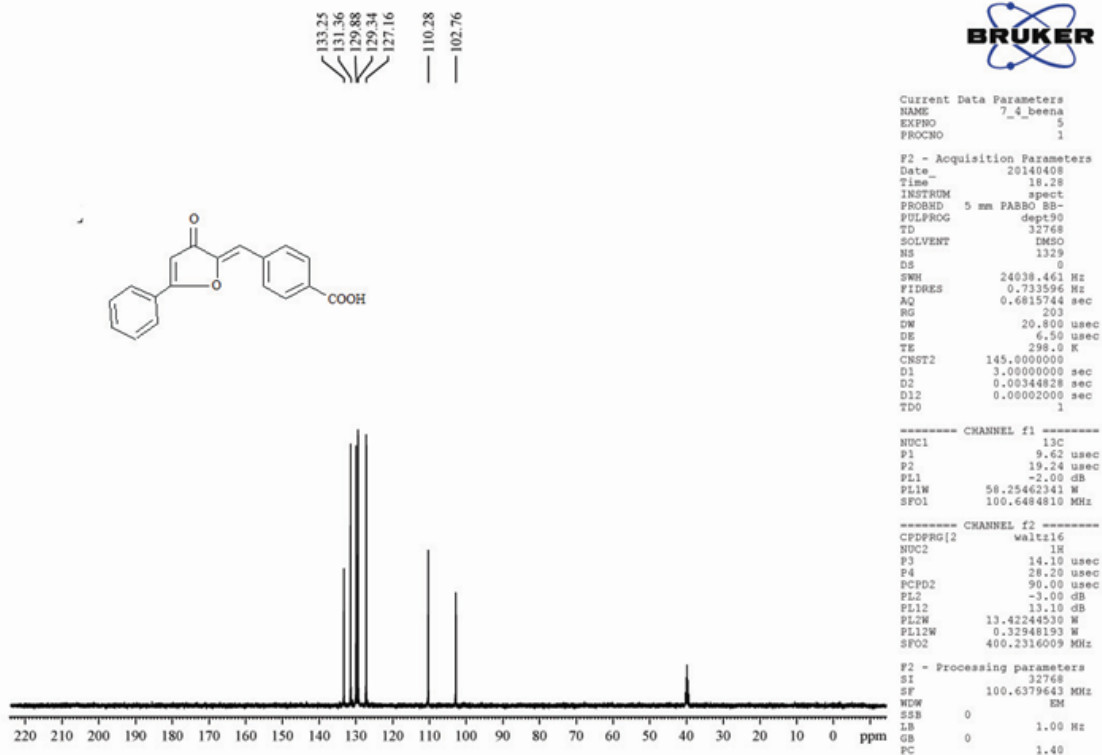

Figure S13. The  $^1\text{H}$ ,  $^1\text{H}$ -COSY NMR spectrum ( $\text{CDCl}_3$ ) of FNPF

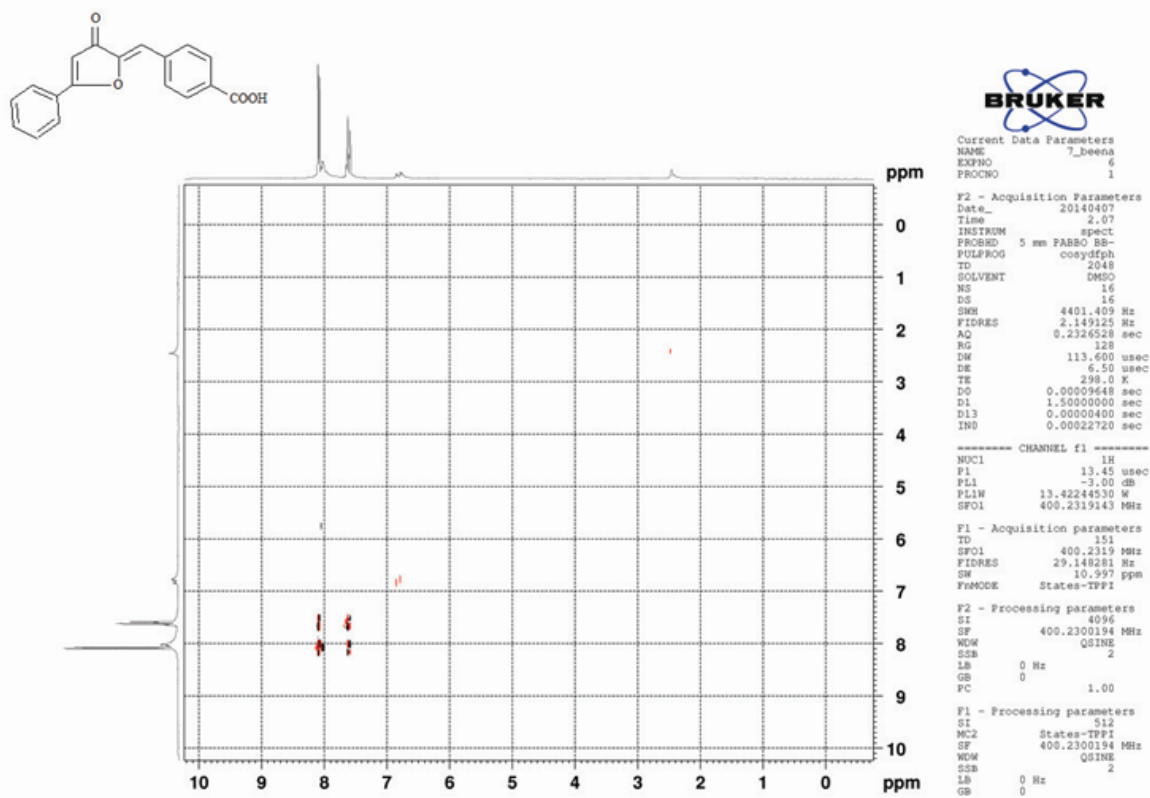

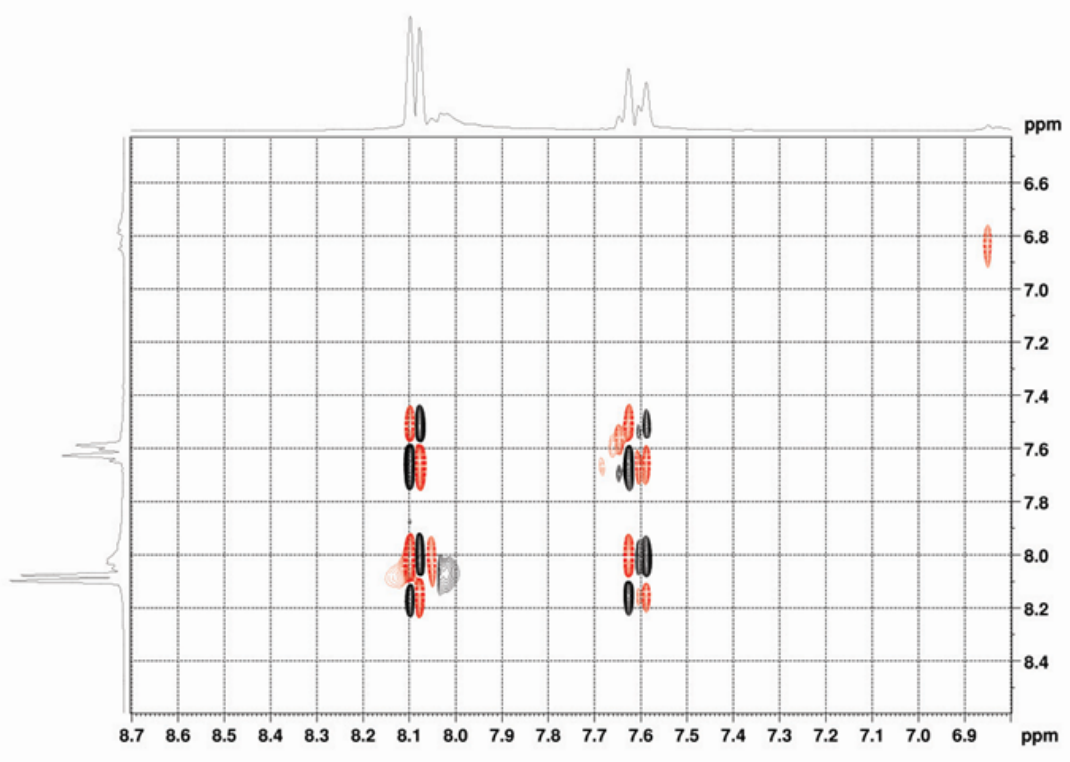

**Figure S14.** The LC-MS spectrum of CBPF

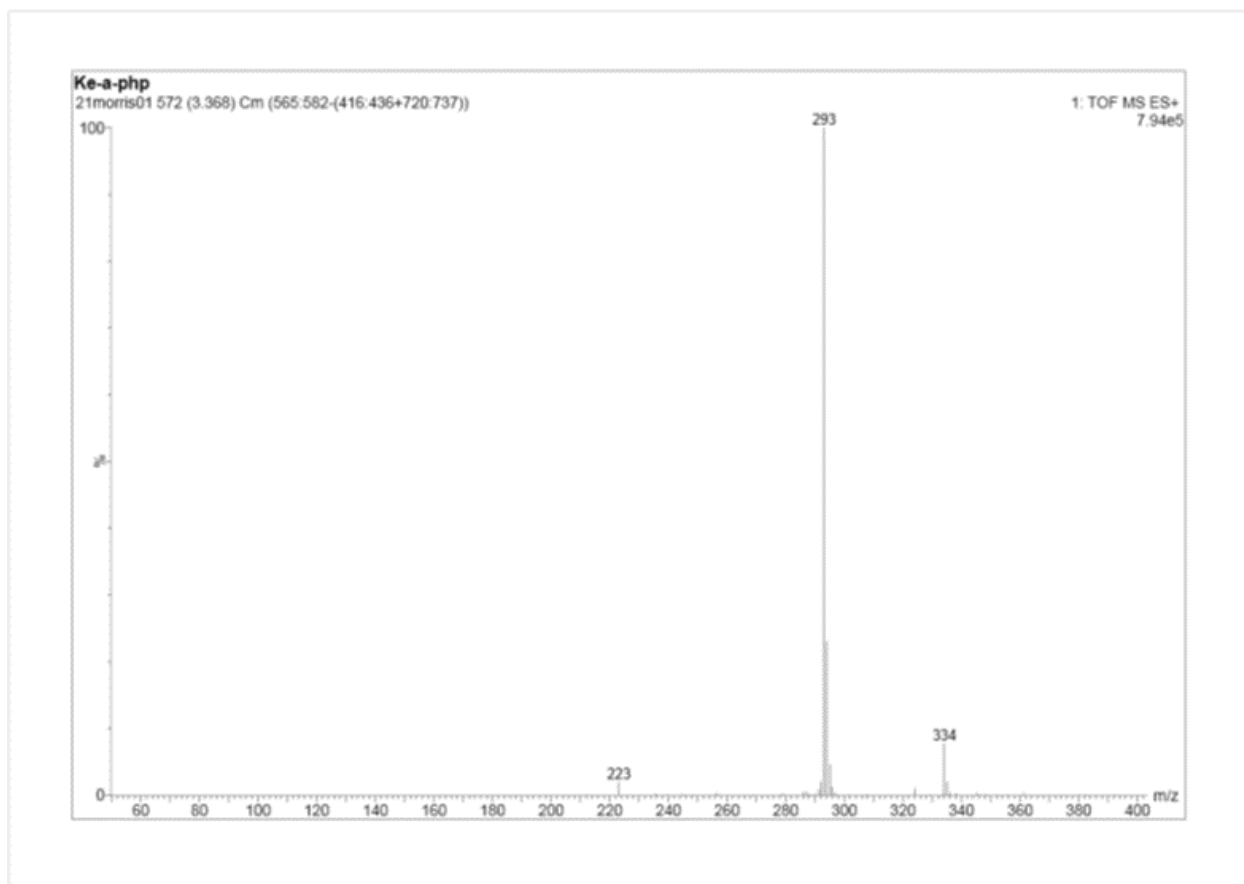



Figure S15. Frontier orbitals of FNPF and CBPF calculated by the TD-DFT/ B3LYP/6-31G+ method on excited state (i) FNPF<sub>HOMO</sub> (G.P), (ii) FNPF<sub>HOMO</sub> (wr), (iii) FNPF<sub>HOMO</sub> (cyhx), (iv) CBPF<sub>HOMO</sub>(G.P), (v) CBPF<sub>HOMO</sub>(wr), (vi) CBPF(cyhx), (vii) FNPF<sub>LUMO</sub> (G.P), (viii) FNPF<sub>LUMO</sub> (wr), (ix) FNPF<sub>LUMO</sub>(cyhx), (x) CBPF<sub>LUMO</sub>(G.P), (xi) CBPF<sub>LUMO</sub> (wr), (xii) CBPF<sub>LUMO</sub>(cyhx).

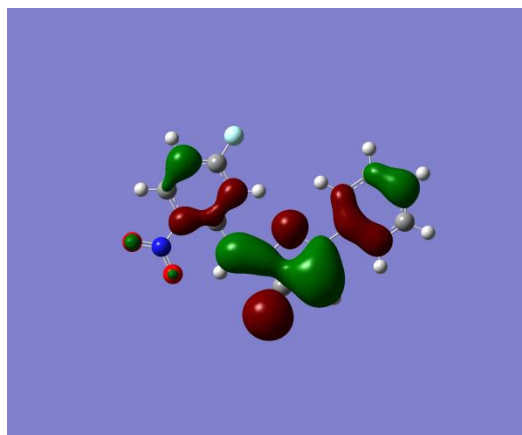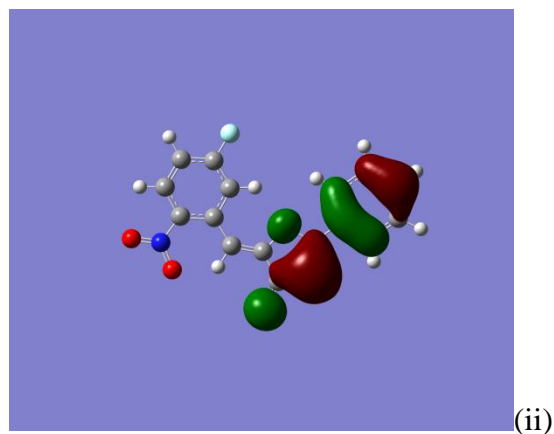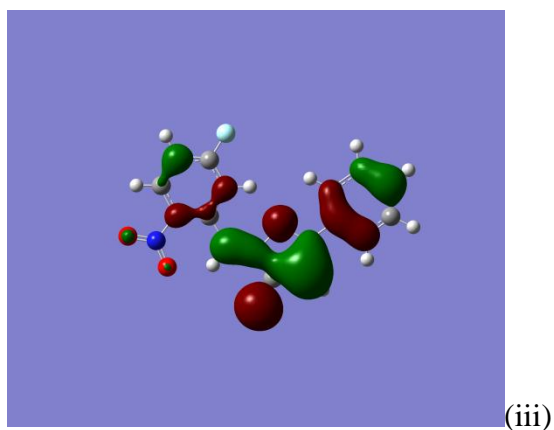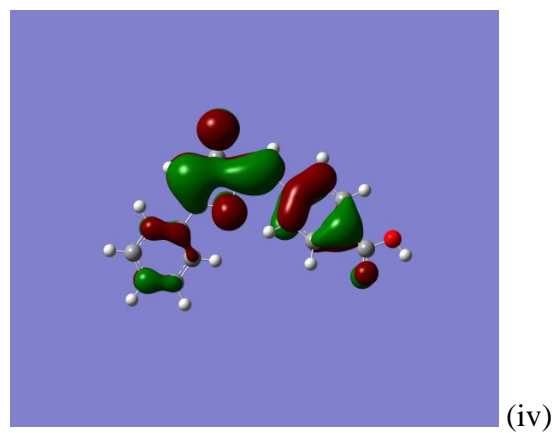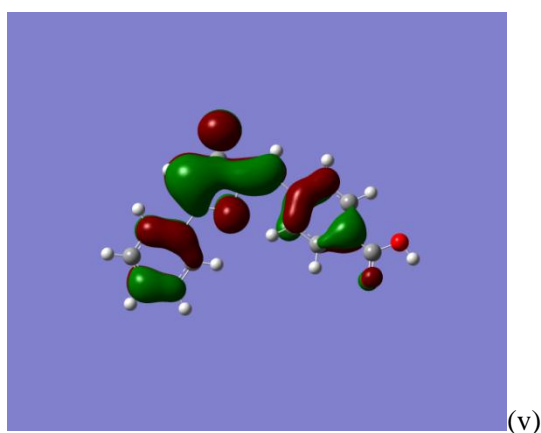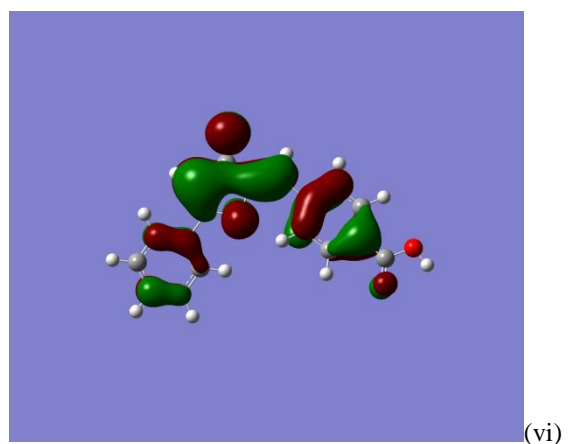

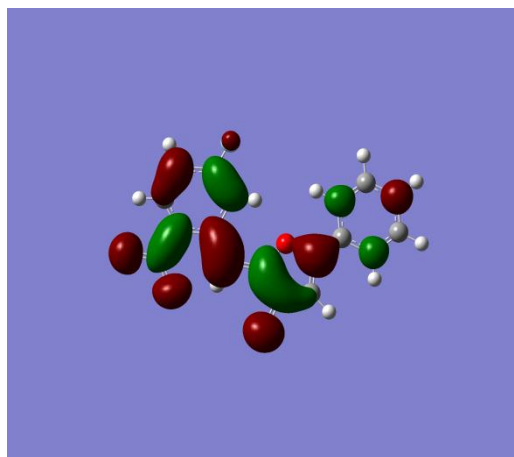

(vii)

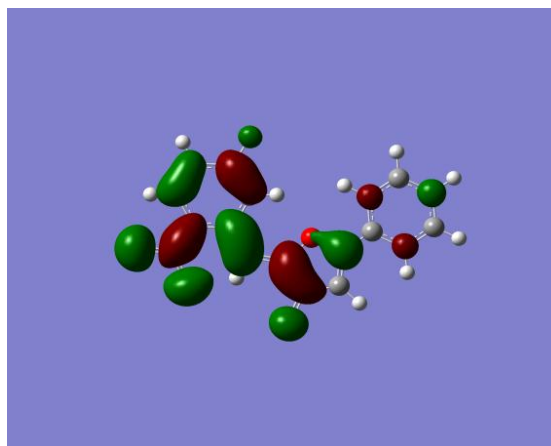

(viii)

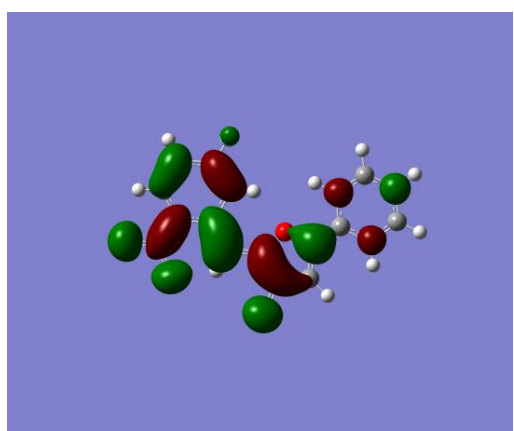

(ix)
